# Supplementary material for: Nonsynonymous variants in the SMAD6 gene predispose to congenital cardiovascular malformation
Source: PubMed Central journal article supplement (PMC3492913; doi:10.1002/humu.22030), 2012-01-20
Supplement: humu0033-0720-SD1.pdf [file humu0033-0720-SD1.pdf]

**Supp. Table S1. Cardiac phenotypes of CVM patients**

| Cardiac phenotype                               | Patient Group 1* | Non-synonymous variants | Patient Group 2* | Non-synonymous variants | Total      |
|-------------------------------------------------|------------------|-------------------------|------------------|-------------------------|------------|
| Aortic stenosis                                 | 4                |                         | 19               |                         | <b>23</b>  |
| Aortic stenosis with bicuspid aortic valve      | 4                |                         | 6                | [SMAD6 p.P415L]         | <b>10</b>  |
| Atrial septal defect                            | 29               |                         | 50               |                         | <b>79</b>  |
| Atrioventricular septal defect                  | 8                |                         | 21               |                         | <b>29</b>  |
| Bicuspid aortic valve                           | 0                |                         | 3                |                         | <b>3</b>   |
| Coarctation of aorta                            | 3                |                         | 23               |                         | <b>26</b>  |
| Coarctation of aorta with bicuspid aortic valve | 4                | [SMAD6 p.C484F]#        | 7                |                         | <b>11</b>  |
| Double inlet left ventricle                     | 4                |                         | 11               |                         | <b>15</b>  |
| Ebstein's anomaly                               | 3                |                         | 6                |                         | <b>9</b>   |
| Hypoplastic left heart                          | 2                |                         | 8                |                         | <b>10</b>  |
| Isomerism                                       | 2                |                         | 8                |                         | <b>10</b>  |
| Mitral atresia                                  | 0                |                         | 2                |                         | <b>2</b>   |
| Mitral valve regurgitation                      | 0                |                         | 3                | [SMAD6: p.A325T]        | <b>3</b>   |
| Patent ductus arteriosus                        | 3                |                         | 15               |                         | <b>18</b>  |
| Patent foramen ovale                            | 4                |                         | 6                |                         | <b>10</b>  |
| Pulmonary atresia                               | 0                |                         | 4                |                         | <b>4</b>   |
| Pulmonary atresia + ventricular septal defect   | 0                |                         | 10               |                         | <b>10</b>  |
| Pulmonary stenosis                              | 2                |                         | 3                |                         | <b>5</b>   |
| Tetralogy of Fallot                             | 0                |                         | 7                |                         | <b>7</b>   |
| Transposition of great arteries                 | 4                |                         | 52               |                         | <b>56</b>  |
| Transposition of great arteries-corrected       | 0                |                         | 9                |                         | <b>9</b>   |
| Tricuspid atresia                               | 4                |                         | 12               |                         | <b>16</b>  |
| Truncus arteriosus                              | 0                |                         | 9                |                         | <b>9</b>   |
| Ventricular septal defect                       | 10               |                         | 40               |                         | <b>50</b>  |
| Other                                           | 0                |                         | 12               |                         | <b>12</b>  |
| <b>Total</b>                                    | <b>90</b>        |                         | <b>346</b>       |                         | <b>436</b> |

Numbers of patient with different cardiac phenotypes in each group are listed.

\*The entire coding sequences of *BMP2* (NM\_001204.6), *BMP1A* (NM\_004329.2) and *SMAD6* (NM\_005585.4) genes were sequenced in the first patient group, whilst only the coding region for the MH2 domain of *SMAD6* was sequenced in the second patient group.

# This patient also had aortic stenosis.
